# Supplementary material
Source: MDPI journal article supplement (https://www.mdpi.com/1999-4907/7/10/217)
Supplement: s1 [file s1]

Forest Management Influences Aboveground Carbon and Tree Species Diversity in Myanmar’s Mixed Deciduous Forests

Kyaw Sein Win Tun 1, Julian Di Stefano 2 and Liubov Volkova 2,*

## Supplementary Tables

**Table S1.** SIMPER (SIMilarity PERcentage) analysis for large trees (≥20cm BBH) showing the species that contributed most to the compositional difference between Khabaung and Kyaukmasin Reserved Forests. Only species that explained a cumulative total 50% dissimilarity are displayed.

| **Species** | **Mean abundance** | | **Contribution to dissimilarity (%)** |
| --- | --- | --- | --- |
|  | Khabaung | Kyaukmasin |  |
|  |  |  |  |
| *Schleichera oleosa* | 0.07 | 1.05 | 5.28 |
| *Terminalia alata* | 1.1 | 0.61 | 4.99 |
| *Dalbergia ovata* | 0.84 | 0 | 4.45 |
| *Lagerstroemia speciosa* | 0.87 | 0.14 | 4.18 |
| *Shorea obtusa* | 0 | 0.75 | 3.65 |
| *Diospyros ehretioides* | 0.07 | 0.64 | 3.25 |
| *Bridelia retusa* | 0.29 | 0.72 | 3.17 |
| *Mitragyna rotundifolia* | 0.61 | 0 | 3.16 |
| *Xylia xylocarpa* | 0.28 | 0.42 | 3.15 |
| *Tectona grandis* | 2.17 | 1.85 | 3.04 |
| *Salmalia insignis* | 0.55 | 0 | 2.88 |
| *Millettia ovalifolia* | 0.58 | 0 | 2.86 |
| *Dalbergia cultrata* | 0.55 | 0 | 2.8 |
| *Lannea coromandelica* | 0.61 | 0.77 | 2.77 |
| *Anogeissus acuminata* | 0.57 | 0.14 | 2.77 |

**Table S2.** SIMPER analysis for large trees (≥20cm DBH) showing the species that contributed most to the compositional difference between Khabaung Reserved Forest and Yoma Protected Public Forest. Only species that explained a cumulative total 50% dissimilarity are displayed.

| **Species** | **Mean abundance** | | **Contribution to dissimilarity (%)** |
| --- | --- | --- | --- |
|  | Khabaung | Yoma |  |
|  |  |  |  |
| *Terminalia alata* | 1.1 | 0 | 8.67 |
| *Pterocarpus macrocarpus* | 0 | 1.07 | 8.60 |
| *Dalbergia ovata* | 0.84 | 0 | 7.12 |
| *Lagerstroemia speciosa* | 0.87 | 0 | 7.02 |
| *Tectona grandis* | 2.17 | 2.98 | 6.44 |
| *Xylia xylocarpa* | 0.28 | 0.62 | 5.75 |
| *Mitragyna rotundifolia* | 0.61 | 0 | 5.05 |
| *Salmalia insignis* | 0.55 | 0 | 4.55 |

**Table S3.** SIMPER analysis for large trees (≥20cm DBH) showing the species that contributed most to the compositional difference between Kyaukmasin Reserved Forest and Yoma Protected Public Forest. Only species that explained a cumulative total 50% dissimilarity are displayed.

| **Species** | **Mean abundance** | | **Contribution to dissimilarity (%)** |
| --- | --- | --- | --- |
|  | Kyaukmasin | Yoma |  |
|  |  |  |  |
| *Tectona grandis* | 1.85 | 2.98 | 8.25 |
| *Pterocarpus macrocarpus* | 0 | 1.07 | 7.39 |
| *Schleichera oleosa* | 1.05 | 0 | 7.17 |
| *Xylia xylocarpa* | 0.42 | 0.62 | 5.83 |
| *Bridelia retusa* | 0.72 | 0 | 5.09 |
| *Shorea obtusa* | 0.75 | 0 | 4.84 |
| *Lannea coromandelica* | 0.77 | 0.17 | 4.81 |
| *Diospyros ehretioides* | 0.64 | 0 | 4.52 |
| *Terminalia alata* | 0.61 | 0 | 4.22 |

**Table S4.** SIMPER analysis for small trees (<20cm DBH) showing the species that contributed most to the compositional difference between Khabaung and Kyaukmasin Reserved Forests. Only species that explained a cumulative total 50% dissimilarity are displayed.

| **Species** | **Mean abundance** | | **Contribution to dissimilarity (%)** |
| --- | --- | --- | --- |
|  | Khabaung | Kyaukmasin |  |
|  |  |  |  |
| *Dalbergia cultrata* | 0.39 | 0 | 8.19 |
| *Bombax insigne* | 0 | 0.28 | 7.91 |
| *Tectona grandis* | 0.14 | 0.50 | 7.88 |
| *Erythrina suberosa* | 0.57 | 0 | 6.19 |
| *Salmalia insignis* | 0.42 | 0 | 5.84 |
| *Lagerstroemia speciosa* | 0.28 | 0.22 | 5.60 |
| *Xylia xylocarpa* | 0.28 | 0.14 | 4.90 |
| *Mitragyna diversifolia* | 0 | 0.46 | 4.08 |

**Table S5.** SIMPER analysis for small trees (<20cm DBH) showing the species that contributed most to the compositional difference between Khabaung Reserved Forest and Yoma Protected Public Forest. Only species that explained a cumulative total 50% dissimilarity are displayed.

| **Species** | **Mean abundance** | | **Contribution to dissimilarity (%)** |
| --- | --- | --- | --- |
|  | Khabaung | Yoma |  |
|  |  |  |  |
| *Tectona grandis* | 0.14 | 1.96 | 19.48 |
| *Pterocarpus macrocarpus* | 0 | 0.79 | 8.76 |
| *Erythrina suberosa* | 0.57 | 0 | 4.50 |
| *Dalbergia cultrata* | 0.39 | 0 | 4.29 |
| *Salmalia insignis* | 0.42 | 0 | 3.78 |
| *Albizia procera* | 0 | 0.35 | 3.68 |
| *Holarrhena pubescens* | 0.07 | 0.35 | 3.53 |
| *Schleichera oleosa* | 0.07 | 0.35 | 3.25 |

© 2016 by the authors. Submitted for possible open access publication under the
terms and conditions of the Creative Commons Attribution (CC-BY) license (http://creativecommons.org/licenses/by/4.0/).
